# Supplementary material
Source: PubMed Central journal article supplement (PMC3694343)
Supplement: NIHMS482901-supplement-Supplementary_Material_S1.pdf [file NIHMS482901-supplement-Supplementary_Material_S1.pdf]

1 A Novel RNA Polymerase-Binding Protein Controlling Genes Involved in Spore  
2 Germination in *Bacillus subtilis*

3  
4 Bjorn A. Traag<sup>a</sup>, Arturo Ramirez-Peralta<sup>b</sup>, Anna F. Wang Erickson<sup>a</sup>, Peter Setlow<sup>b</sup> and Richard  
5 Losick<sup>a#</sup>

6 <sup>a</sup>Department of Molecular and Cellular Biology, Harvard University, Cambridge, MA 02138,

7 <sup>b</sup>Department of Molecular, Microbial and Structural Biology, University of Connecticut Health  
8 Center, Farmington, CT 06030

9

10

11 **Supporting Information**

12 (SI Experimental Procedures; SI References; Tables S1-2; Figures S1-3)

13

14

15 **SI Experimental Procedures**

16 **Plasmid construction**

17 pAH125 (*amyE*::P<sub>*sspB*</sub>-*lacZ*) was constructed as previously described (Camp & Losick, 2009).  
18 pBAT84 (*amyE*::P<sub>*spoVT*</sub>-*lacZ*) was generated by cloning a *EcoRI* and *BamHI* digested PCR  
19 fragment containing the *spoVT* promoter into pAH124 (Camp & Losick, 2009) digested with the  
20 same restriction enzymes. pBAT151 (*sacA*::*ylyA*) was constructed as previously described  
21 (Traag *et al.*, 2013). pBAT260 (*sacA*::P<sub>*sspB*</sub>-*ylyA*) was generated by fusing a PCR fragment  
22 containing the *sspB* promoter and ribosome binding site (RBS) with a PCR fragment containing  
23 the open reading frame (ORF) of *ylyA* by overlapping PCR. The resulting fragment was then  
24 digested with *EcoRI* and *BamHI*, and cloned into pSac-Cam (Middleton & Hofmeister, 2004)  
25 digested with the same restriction enzymes. pBAT298-300 (P<sub>*sspB*</sub>-directed overexpression of  
26 *yocK*, *yteA* and *dksA*) were generated in the same way. pRLG10611 was generated by cloning a  
27 *XbaI* and *XhoI* digested PCR fragment containing the *ylyA* ORF into pET28a (Novagen),  
28 resulting in a construct for the expression of C-terminal, hexahistidine-tagged YlyA.

29

30 **Protein expression and purification**

31 *E. coli* BL21 (DE3) derivative strains carrying plasmids pRLG10611 (see above), pDP90  
32 (Kearns *et al.*, 2005), pRL3034 (Losick lab strain collection) or pMF327 (Fujita & Sadaie,  
33 1998), encoding hexahistidine-tagged YlyA, SinI,  $\sigma^G$  and  $\sigma^A$ , respectively, were grown at 25°C  
34 in 1L Luria Bertani (LB) broth. When the cultures reached an OD<sub>600</sub> of 0.6-0.8, protein  
35 expression was induced by the addition of 100  $\mu$ M isopropyl  $\beta$ -D-1-thiogalactopyranoside  
36 (IPTG). Cells were harvested and pelleted after four hours of additional growth at 25°C, and cell  
37 pellets were frozen overnight at -80°C. The next day cell pellets were resuspended in lysis buffer

38 (50 mM Tris-Cl pH 8.0, 300 mM NaCl, 5 mM imidazole, 1 mM DTT, 1 mM  
39 phenylmethanesulfonylfluoride (PMSF)), and cells were lysed by sonication. Cell debris was  
40 removed by centrifugation, and the supernatants were incubated with Ni-NTA agarose beads  
41 (Qiagen) at 4°C for 30 minutes. The Ni-NTA agarose-cell suspension was then applied to a poly-  
42 prep chromatography column (Biorad). The resulting Ni-NTA column was consecutively washed  
43 with 10 column volumes of lysis buffer, one column volume of buffer containing 25 mM  
44 imidazole, and one column volume of buffer containing 50 mM imidazole. Proteins were eluted  
45 from the column with column volume fractions of buffer containing 200 mM imidazole. The  
46 elution fractions were run on a SDS-PAGE gel, and appropriate fractions were dialyzed at 4°C  
47 overnight against 1L storage buffer (25 mM Tris-Cl pH 8.0, 100 mM NaCl, 50% glycerol, 1 mM  
48 DTT).

49 For purification of *B. subtilis* RNA polymerase core, approximately 500 bp of the 5' end  
50 of *rpoC*, excluding the stop codon, was cloned *NdeI* and *XhoI* into pET28a, resulting in a  
51 truncated *rpoC* gene in frame with a sequence coding for six histidine residues. This plasmid-  
52 borne fragment and an approximately 500 bp genomic DNA fragment downstream of *rpoC* were  
53 amplified by PCR, using primers containing sequences complementary to a spectinomycin  
54 resistance cassette. The resulting fragments and outer primers were then used to amplify a  
55 spectinomycin resistance cassette. *ylxA* mutant cells were transformed with this double stranded  
56 linear DNA fragment, and double cross-over events were selected by plating on LB agar  
57 containing spectinomycin. The resulting strain (RL5493) encodes a C-terminal, hexahistidine-  
58 tagged  $\beta'$  subunit as the only copy in the cell. This strain was grown in 1L LB broth at 37°C until  
59 an OD<sub>600</sub> of 1, at which point cells were harvested and pelleted. The pellet was resuspended  
60 immediately in buffer containing 300 mM NaCl, 50 mM Na<sub>2</sub>HPO<sub>4</sub>, 3 mM 2-mercaptoethanol, 5

61 % glycerol, and 1 mM PMSF. RNA polymerase core was purified using Ni-NTA agarose similar  
62 to previously described (Anthony *et al.*, 2000). Fractions eluted from the Ni-NTA column were  
63 run on a SDS-PAGE gel, and appropriate fractions were dialyzed at 4°C overnight against buffer  
64 containing 50 mM Tris-Cl pH 8.0, 0.1 M NaCl, 3 mM 2-mercaptoethanol, 50% glycerol. RNA  
65 polymerase preparations were stored at -20°C.

66

## 67 **SI References**

- 68 Anthony, L. C., I. Artsimovitch, V. Svetlov, R. Landick & R. R. Burgess, (2000) Rapid purification of His(6)-  
69 tagged *Bacillus subtilis* core RNA polymerase. *Protein Expr Purif* **19**: 350-354.
- 70 Camp, A. H. & R. Losick, (2009) A feeding tube model for activation of a cell-specific transcription factor  
71 during sporulation in *Bacillus subtilis*. *Genes Dev* **23**: 1014-1024.
- 72 Fujita, M. & Y. Sadaie, (1998) Promoter selectivity of the *Bacillus subtilis* RNA polymerase sigmaA and  
73 sigmaH holoenzymes. *J Biochem* **124**: 89-97.
- 74 Kearns, D. B., F. Chu, S. S. Branda, R. Kolter & R. Losick, (2005) A master regulator for biofilm formation  
75 by *Bacillus subtilis*. *Mol Microbiol* **55**: 739-749.
- 76 Middleton, R. & A. Hofmeister, (2004) New shuttle vectors for ectopic insertion of genes into *Bacillus*  
77 *subtilis*. *Plasmid* **51**: 238-245.
- 78 Traag, B. A., A. Pugliese, J. A. Eisen & R. Losick, (2013) Gene conservation among endospore-forming  
79 bacteria reveals additional sporulation genes in *Bacillus subtilis*. *J Bacteriol* **195**: 253-260.
- 80 Youngman, P., J. B. Perkins & R. Losick, (1984) Construction of a cloning site near one end of Tn917 into  
81 which foreign DNA may be inserted without affecting transposition in *Bacillus subtilis* or  
82 expression of the transposon-borne erm gene. *Plasmid* **12**: 1-9.

83

84

85

86 **Table S1. *B. subtilis* strains used in this study.**

| Strain <sup>a</sup> | Genotype                                                                                                                    | Source or reference             |
|---------------------|-----------------------------------------------------------------------------------------------------------------------------|---------------------------------|
| PY79                | Prototrophic derivative of <i>B. subtilis subsp. subtilis</i> 168                                                           | (Youngman <i>et al.</i> , 1984) |
| RL5371              | <i>ylyA::erm</i>                                                                                                            | (Traag <i>et al.</i> , 2013)    |
| RL5372              | <i>ylyA::erm sacA::ylyA (kan)</i>                                                                                           | (Traag <i>et al.</i> , 2013)    |
| RL5480              | <i>ylyA::erm sacA::P<sub>sspB</sub>-ylyA (cam)</i>                                                                          | This study                      |
| RL5481              | <i>amyE::P<sub>sspB</sub>-lacZ (neo)</i>                                                                                    | This study                      |
| RL5482              | <i>ylyA::erm amyE::P<sub>sspB</sub>-lacZ (neo)</i>                                                                          | This study                      |
| RL5483              | <i>ylyA::erm sacA::ylyA (kan) amyE::P<sub>sspB</sub>-lacZ (cat)</i>                                                         | This study                      |
| RL5484              | <i>ylyA::erm sacA::P<sub>sspB</sub>-ylyA (cat) amyE::P<sub>sspB</sub>-lacZ (neo)</i>                                        | This study                      |
| RL5485              | <i>amyE::P<sub>spoVT</sub>-lacZ (neo)</i>                                                                                   | This study                      |
| RL5486              | <i>ylyA::erm amyE::P<sub>spoVT</sub>-lacZ (neo)</i>                                                                         | This study                      |
| RL5487              | <i>ylyA::erm sacA::P<sub>sspB</sub>-ylyA (cat) amyE::P<sub>spoVT</sub>-lacZ (neo)</i>                                       | This study                      |
| AHB1449             | <i>ywrK::Tn917::amyE::P<sup>T7</sup>-lacZ (neo) ylnF::Tn917::amyE::P<sub>spoIIQ</sub>-T7RNAP (spec)</i>                     | (Camp & Losick, 2009)           |
| RL5488              | <i>ylyA::erm ywrK::Tn917::amyE::P<sup>T7</sup>-lacZ (neo)</i><br><i>ylnF::Tn917::amyE::P<sub>spoIIQ</sub>-T7RNAP (spec)</i> | This study                      |
| RL5489              | <i>ylyA::erm sacA::P<sub>sspB</sub>-ylyA (cat) ywrK::Tn917::amyE::P<sup>T7</sup>-lacZ (neo)</i>                             | This study                      |

|        |                                                                                      |            |
|--------|--------------------------------------------------------------------------------------|------------|
|        | <i>ylnF::Tn917::amyE::P<sub>spoIIQ</sub>-T7RNAP (spec)</i>                           |            |
| RL5490 | <i>ylyA::erm sacA::P<sub>sspB</sub>-yocK (cat) amyE::P<sub>sspB</sub>-lacZ (neo)</i> | This study |
| RL5491 | <i>ylyA::erm sacA::P<sub>sspB</sub>-yteA (cat) amyE::P<sub>sspB</sub>-lacZ (neo)</i> | This study |
| RL5492 | <i>ylyA::erm sacA::P<sub>sspB</sub>-dksA (cat) amyE::P<sub>sspB</sub>-lacZ (neo)</i> | This study |
| RL5493 | <i>ylyA::erm rpoC::rpoC-6His (spec)</i>                                              | This study |

87 <sup>a</sup>All strains were derived from the prototrophic laboratory strain PY79.

88

89 **Table S2. Relative levels of germination proteins in spores from wild type, *ylyA* mutant,**

90 **and *ylyA* overexpression strains.**

|        | wild type | $\Delta ylyA$ | $P_{sspB}$ - <i>ylyA</i> |
|--------|-----------|---------------|--------------------------|
| GerAA  | 1         | 1             | 0.22                     |
| GerAC  | 1         | 0.85          | 0.13                     |
| GerBC  | 1         | 0.25          | 0.12                     |
| GerKA  | 1         | 1             | 0.25                     |
| SpoVAD | 1         | 2.5           | 1                        |
| GerD   | 1         | 1             | 1                        |

91 \*All values are averages of results from replicate western blot analysis of two independent spore

92 preparations, and these values differed by  $\leq 20\%$ . Values for wild type spores have been set at 1,

93 and values for other strains are expressed relative to these values.

94

95

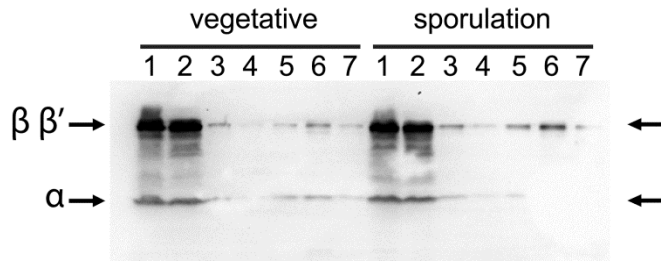

**Fig. S1. YlyA interacts with RNA polymerase from lysate from vegetative and sporulating cells.** Western blot analysis of the co-immobilization of RNA polymerase subunits with hexahistidine-tagged YlyA. RNA polymerase was similarly co-immobilized when lysates from vegetative (left) and sporulating (right) *ylyA* mutant cells were used. Lanes: soluble protein lysate (1), flow through (2), first wash (3), final wash (4) elution fractions (5-7). Arrows indicate bands corresponding to the  $\beta/\beta'$  and  $\alpha$  subunits of RNA polymerase which co-eluted with YlyA.





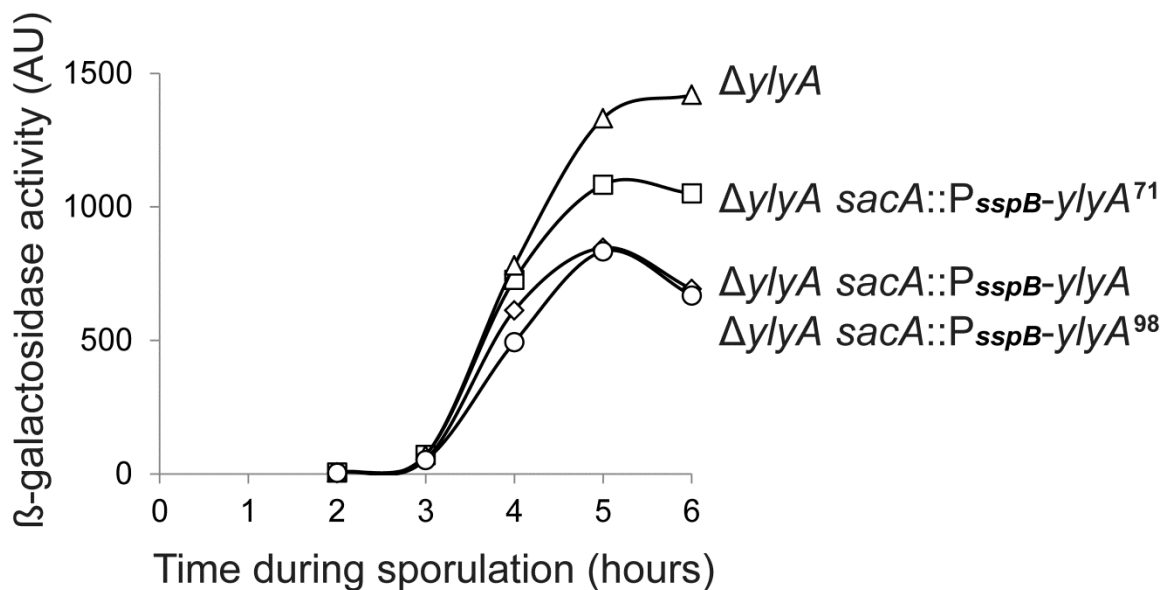

**Fig. S3. The C-terminus of YlyA is partially dispensible *in vivo*.**  $\beta$ -galactosidase activity (AU) was monitored for samples taken at the indicated time points after sporulation was induced by resuspension.  $P_{sspB}$ -directed *lacZ* activity was determined in *ylyA* mutant cells (triangles), *ylyA* mutant cells carrying a copy of *ylyA* expressed from the *sspB* promoter at the ectopic *sacA* locus (circles), and *ylyA* mutant cells carrying C-terminally truncated copies of the *ylyA* gene encoding YlyA residues 1-98 (*ylyA*<sup>98</sup>; diamonds) and YlyA residues 1-71 (*ylyA*<sup>71</sup>; squares), expressed from the *sspB* promoter at the ectopic *sacA* locus. All strains carry the  $P_{sspB}$ -*lacZ* reporter construct at the *amyE* locus.
